# Supplementary material for: Alliance of Efflux Pumps with β-Lactamases in Multidrug-Resistant Klebsiella pneumoniae Isolates
Source: PubMed Central journal article supplement (PMC6807647; doi:10.1089/mdr.2018.0414), 2019-10-11
Supplement: Supp_TableS1.pdf [file Supp_TableS1.pdf]

## Supplementary Data

SUPPLEMENTARY TABLE S1. MIC VALUES OBSERVED FOR DIFFERENT ANTIBIOTICS WITH  $\beta$ -LACTAM INHIBITOR AND EFFLUX PUMP INHIBITORS AMONG ESBL-POSITIVE *K. PNEUMONIAE* ISOLATES

| Strains   | AZT    | AZT+CA | AZT+EPI | AZT+EP2 | CAZ    | CAZ+CA | CAZ+EPI | CAZ+EP2 | IM   | IM+CA | IM+EPI | IM+EP2 |
|-----------|--------|--------|---------|---------|--------|--------|---------|---------|------|-------|--------|--------|
| GMCH01    | 500    | 31.25  | 500     | 250     | >4,000 | 4,000  | >4,000  | 4,000   | 64   | 16    | 16     | 64     |
| GMCH02    | 1,000  | 15.78  | 250     | 500     | >4,000 | 4,000  | >4,000  | 500     | 64   | 8     | 16     | 64     |
| GMCH03    | >2,000 | 3.9    | 62.5    | 250     | >4,000 | >4,000 | >2,000  | 2,000   | >128 | >128  | >128   | >128   |
| GMCH04    | >2,000 | 7.8    | 7.8     | 125     | >4,000 | >4,000 | >2,000  | 2,000   | >128 | 128   | >128   | >128   |
| GMCH07    | 500    | 15.8   | 250     | 250     | >4,000 | 4,000  | >2,000  | >4,000  | 16   | 16    | 8      | 16     |
| GMCH08    | 500    | 7.8    | 500     | 500     | >4,000 | >4,000 | >4,000  | >4,000  | >128 | 8     | 32     | 64     |
| GMCH09    | 500    | 3.9    | 250     | 125     | >4,000 | >4,000 | >2,000  | 2,000   | 16   | 16    | 8      | 16     |
| GMCH10    | 62.5   | 62.5   | 0.487   | 31.25   | 250    | 250    | 31.25   | 125     | 64   | 64    | 1      | 32     |
| GMCH11    | 500    | 0.250  | 500     | 250     | 4,000  | 2,000  | 4,000   | 1,000   | 16   | 1     | 2      | 4      |
| GMCH12    | >2,000 | 7.8    | 2,000   | 2,000   | 4,000  | 500    | 4,000   | 2,000   | 16   | 0.315 | 1      | 2      |
| GMCH13    | >2,000 | 500    | 2,000   | 2,000   | >4,000 | 125    | >4,000  | 4,000   | 64   | 16    | 16     | 16     |
| GMCH15    | 125    | 125    | 125     | 31.25   | 4,000  | 4,000  | 4,000   | 2,000   | 64   | 16    | 16     | 16     |
| GMCH16    | 31.25  | 1.9    | 1.9     | 1.9     | >4,000 | 31.25  | >2,000  | 2,000   | 8    | 0.5   | 8      | 8      |
| GMCH19    | 500    | 62.5   | 125     | 250     | >4,000 | 125    | >1,000  | 1,000   | 8    | 8     | 8      | 8      |
| GMCH20    | 1,000  | 7.8    | 500     | 250     | 4,000  | 15.6   | 4,000   | 1,000   | 8    | 4     | 4      | 4      |
| GMCH1101  | 1,000  | 0.487  | 500     | 500     | 500    | 0.975  | 250     | 62.5    | 2    | 0.125 | 0.5    | 1      |
| GMCH1249  | 250    | 62.5   | 125     | 31.25   | 250    | 125    | 125     | 62.5    | 8    | 0.250 | 2      | 4      |
| GMCH1144  | 2,000  | 15.62  | 2,000   | 2,000   | 1,000  | 15.62  | 1,000   | 500     | 8    | 1     | 2      | 2      |
| GMCH1143  | 2,000  | 250    | 2,000   | 2,000   | 1,000  | 250    | 1,000   | 500     | 4    | 1     | 2      | 4      |
| GMCH490   | 2,000  | 15.6   | 2,000   | 1,000   | 1,000  | 7.8    | 500     | 500     | 4    | 1     | 2      | 4      |
| GMCH827   | 250    | 7.9    | 31.25   | 250     | 4,000  | 15.8   | 2,000   | 2,000   | 8    | 0.500 | 1      | 4      |
| GMCH1428  | 1,000  | 7.8    | 125     | 250     | 4,000  | 1,000  | 2,000   | 2,000   | 128  | 2     | 32     | 128    |
| GMCHB8    | 1,000  | 15.62  | 1,000   | 500     | >4,000 | 2,000  | >4,000  | 2,000   | 64   | 0.5   | 64     | 64     |
| GMCH1573  | 1,000  | 7.8    | 2,000   | 250     | >4,000 | 31.25  | >4,000  | 4,000   | >128 | >128  | >128   | >128   |
| GMCH976   | 2,000  | 7.8    | 250     | 125     | 4,000  | 4,000  | 2,000   | 1,000   | 8    | 1     | 1      | 4      |
| GMCH1522  | 2,000  | 250    | 500     | 1,000   | 4,000  | 500    | 4,000   | 4,000   | 16   | 8     | 16     | 16     |
| GMCH1243  | 500    | 3.9    | 500     | 500     | 4,000  | 4,000  | >4,000  | 4,000   | 16   | 32    | 16     | 32     |
| GMCH8941  | 125    | 3.9    | 62.5    | 125     | 125    | 1.95   | 62.5    | 62.5    | 8    | 1     | 2      | 4      |
| GMCH14543 | 125    | 7.8    | 62.5    | 125     | 125    | 15.8   | 7.8     | 125     | 1    | 0.125 | 0.25   | 1      |
| GMCH7708  | 250    | 7.9    | 31.25   | 125     | 62.5   | 7.9    | 7.8     | 62.5    | 1    | 0.25  | 0.125  | 1      |
| GMCH14114 | 500    | 15.6   | 500     | 125     | 250    | 7.8    | 250     | 250     | 8    | 1     | 8      | 8      |
| GMCH8006  | 250    | 1.95   | 125     | 250     | 125    | 7.8    | 125     | 125     | 8    | 0.25  | 1      | 2      |
| GMCH7662  | 250    | 0.487  | 125     | 62.5    | 62.5   | 0.487  | 31.25   | 15.62   | 4    | 0.062 | 0.25   | 0.5    |

The isolates with  $\geq 8$ -fold reduction with either EPI are highlighted in gray.  
 AZM, Aztreonam; CA, Potassium clavulanic acid; CAZ, Ceftazidime; IM, Imipenem; EPI, CCCP (16  $\mu\text{g/mL}$ ); EP2, PA $\beta$ N (25  $\mu\text{g/mL}$ ).
